# Supplementary material
Source: publisher site journal article supplement (https://www.kjim.org/upload/media/kjim-2025-171-Supplementary-Table-6.pdf)
Supplement: Supplementary file 1 [file kjim-2025-171-Supplementary-Table-6.pdf]

**Supplementary Table 6. Stratification analysis of the incident risk of hepatic failure following zoster vaccination in the propensity score-matched cohort**

| Hepatic failure                      | Events, n (%) | Incidence rate <sup>b)</sup> | aHR (95% CI)                      |                                   |
|--------------------------------------|---------------|------------------------------|-----------------------------------|-----------------------------------|
|                                      |               |                              | Model 1 <sup>c)</sup>             | Model 2 <sup>d)</sup>             |
| Sex                                  |               |                              |                                   |                                   |
| Male                                 |               |                              |                                   |                                   |
| Unvaccinated                         | 407 (0.13)    | 0.10                         | 1.0 (reference)                   | 1.0 (reference)                   |
| Vaccinated                           | 233 (0.07)    | 0.06                         | 0.60 (0.51 to 0.71) <sup>e)</sup> | 0.60 (0.51 to 0.70) <sup>e)</sup> |
| Female                               |               |                              |                                   |                                   |
| Unvaccinated                         | 417 (0.10)    | 0.10                         | 1.0 (reference)                   | 1.0 (reference)                   |
| Vaccinated                           | 330 (0.08)    | 0.09                         | 0.82 (0.71 to 0.95) <sup>e)</sup> | 0.81 (0.70 to 0.94) <sup>e)</sup> |
| Age (yr)                             |               |                              |                                   |                                   |
| < 60                                 |               |                              |                                   |                                   |
| Unvaccinated                         | 345 (0.18)    | 0.08                         | 1.0 (reference)                   | 1.0 (reference)                   |
| Vaccinated                           | 208 (0.11)    | 0.06                         | 0.61 (0.51 to 0.73) <sup>e)</sup> | 0.60 (0.51 to 0.72) <sup>e)</sup> |
| ≥ 60                                 |               |                              |                                   |                                   |
| Unvaccinated                         | 479 (0.09)    | 0.12                         | 1.0 (reference)                   | 1.0 (reference)                   |
| Vaccinated                           | 355 (0.07)    | 0.10                         | 0.79 (0.69 to 0.91) <sup>e)</sup> | 0.79 (0.68 to 0.90) <sup>e)</sup> |
| Region of residence                  |               |                              |                                   |                                   |
| Urban                                |               |                              |                                   |                                   |
| Unvaccinated                         | 394 (0.12)    | 0.10                         | 1.0 (reference)                   | 1.0 (reference)                   |
| Vaccinated                           | 305 (0.09)    | 0.08                         | 0.80 (0.69 to 0.93) <sup>e)</sup> | 0.79 (0.68 to 0.92) <sup>e)</sup> |
| Rural                                |               |                              |                                   |                                   |
| Unvaccinated                         | 430 (0.11)    | 0.10                         | 1.0 (reference)                   | 1.0 (reference)                   |
| Vaccinated                           | 258 (0.07)    | 0.07                         | 0.63 (0.54 to 0.74) <sup>e)</sup> | 0.62 (0.54 to 0.73) <sup>e)</sup> |
| Household income                     |               |                              |                                   |                                   |
| Low (0th–39th percentile)            |               |                              |                                   |                                   |
| Unvaccinated                         | 261 (0.12)    | 0.06                         | 1.0 (reference)                   | 1.0 (reference)                   |
| Vaccinated                           | 178 (0.08)    | 0.05                         | 0.72 (0.59 to 0.87) <sup>e)</sup> | 0.71 (0.59 to 0.86) <sup>e)</sup> |
| Middle (40th–79th percentile)        |               |                              |                                   |                                   |
| Unvaccinated                         | 295 (0.11)    | 0.07                         | 1.0 (reference)                   | 1.0 (reference)                   |
| Vaccinated                           | 201 (0.08)    | 0.05                         | 0.72 (0.61 to 0.87) <sup>e)</sup> | 0.72 (0.60 to 0.86) <sup>e)</sup> |
| High (80th–100th percentile)         |               |                              |                                   |                                   |
| Unvaccinated                         | 268 (0.10)    | 0.06                         | 1.0 (reference)                   | 1.0 (reference)                   |
| Vaccinated                           | 184 (0.07)    | 0.05                         | 0.70 (0.58 to 0.85) <sup>e)</sup> | 0.69 (0.57 to 0.83) <sup>e)</sup> |
| Body mass index (kg/m <sup>2</sup> ) |               |                              |                                   |                                   |
| < 23.0                               |               |                              |                                   |                                   |
| Unvaccinated                         | 202 (0.11)    | 0.05                         | 1.0 (reference)                   | 1.0 (reference)                   |
| Vaccinated                           | 141 (0.07)    | 0.04                         | 0.73 (0.59 to 0.90) <sup>e)</sup> | 0.72 (0.58 to 0.89) <sup>e)</sup> |
| 23.0–24.9                            |               |                              |                                   |                                   |
| Unvaccinated                         | 214 (0.11)    | 0.05                         | 1.0 (reference)                   | 1.0 (reference)                   |
| Vaccinated                           | 135 (0.07)    | 0.04                         | 0.66 (0.54 to 0.82) <sup>e)</sup> | 0.66 (0.53 to 0.82) <sup>e)</sup> |
| ≥ 25.0                               |               |                              |                                   |                                   |
| Unvaccinated                         | 408 (0.12)    | 0.10                         | 1.0 (reference)                   | 1.0 (reference)                   |
| Vaccinated                           | 287 (0.08)    | 0.08                         | 0.73 (0.63 to 0.85) <sup>e)</sup> | 0.72 (0.62 to 0.84) <sup>e)</sup> |

Supplementary Table 6. Continued

| Hepatic failure                            | Events, n (%) | Incidence rate <sup>b)</sup> | aHR (95% CI)                      |                                   |
|--------------------------------------------|---------------|------------------------------|-----------------------------------|-----------------------------------|
|                                            |               |                              | Model 1 <sup>c)</sup>             | Model 2 <sup>d)</sup>             |
| Smoking status <sup>a)</sup>               |               |                              |                                   |                                   |
| Non-smoker                                 |               |                              |                                   |                                   |
| Unvaccinated                               | 516 (0.10)    | 0.12                         | 1.0 (reference)                   | 1.0 (reference)                   |
| Vaccinated                                 | 385 (0.08)    | 0.10                         | 0.78 (0.68 to 0.89) <sup>e)</sup> | 0.77 (0.68 to 0.88) <sup>e)</sup> |
| Smoker                                     |               |                              |                                   |                                   |
| Unvaccinated                               | 308 (0.14)    | 0.07                         | 1.0 (reference)                   | 1.0 (reference)                   |
| Vaccinated                                 | 178 (0.08)    | 0.05                         | 0.60 (0.50 to 0.72) <sup>e)</sup> | 0.59 (0.49 to 0.72) <sup>e)</sup> |
| Alcohol consumption (day per week)         |               |                              |                                   |                                   |
| < 1                                        |               |                              |                                   |                                   |
| Unvaccinated                               | 326 (0.08)    | 0.08                         | 1.0 (reference)                   | 1.0 (reference)                   |
| Vaccinated                                 | 191 (0.05)    | 0.05                         | 0.62 (0.52 to 0.74) <sup>e)</sup> | 0.62 (0.52 to 0.74) <sup>e)</sup> |
| 1–4                                        |               |                              |                                   |                                   |
| Unvaccinated                               | 478 (0.15)    | 0.12                         | 1.0 (reference)                   | 1.0 (reference)                   |
| Vaccinated                                 | 359 (0.11)    | 0.10                         | 0.77 (0.67 to 0.88) <sup>e)</sup> | 0.77 (0.67 to 0.88) <sup>e)</sup> |
| ≥ 5                                        |               |                              |                                   |                                   |
| Unvaccinated                               | 20 (0.17)     | 0.005                        | 1.0 (reference)                   | 1.0 (reference)                   |
| Vaccinated                                 | 13 (0.10)     | 0.003                        | 0.63 (0.31 to 1.26)               | 0.62 (0.31 to 1.25)               |
| Physical activity                          |               |                              |                                   |                                   |
| Insufficient physical activity             |               |                              |                                   |                                   |
| Unvaccinated                               | 644 (0.11)    | 0.16                         | 1.0 (reference)                   | 1.0 (reference)                   |
| Vaccinated                                 | 428 (0.08)    | 0.12                         | 0.70 (0.62 to 0.79) <sup>e)</sup> | 0.69 (0.61 to 0.78) <sup>e)</sup> |
| Sufficient physical activity               |               |                              |                                   |                                   |
| Unvaccinated                               | 180 (0.11)    | 0.04                         | 1.0 (reference)                   | 1.0 (reference)                   |
| Vaccinated                                 | 135 (0.08)    | 0.04                         | 0.76 (0.61 to 0.95) <sup>e)</sup> | 0.75 (0.60 to 0.93) <sup>e)</sup> |
| Medication use for coronary artery disease |               |                              |                                   |                                   |
| No                                         |               |                              |                                   |                                   |
| Unvaccinated                               | 789 (0.11)    | 0.19                         | 1.0 (reference)                   | 1.0 (reference)                   |
| Vaccinated                                 | 541 (0.08)    | 0.15                         | 0.71 (0.64 to 0.80) <sup>e)</sup> | 0.71 (0.63 to 0.79) <sup>e)</sup> |
| Yes                                        |               |                              |                                   |                                   |
| Unvaccinated                               | 35 (0.13)     | 0.01                         | 1.0 (reference)                   | 1.0 (reference)                   |
| Vaccinated                                 | 22 (0.09)     | 0.01                         | 0.67 (0.39 to 1.14)               | 0.67 (0.39 to 1.14)               |
| Medication use for hypertension            |               |                              |                                   |                                   |
| No                                         |               |                              |                                   |                                   |
| Unvaccinated                               | 524 (0.11)    | 0.13                         | 1.0 (reference)                   | 1.0 (reference)                   |
| Vaccinated                                 | 373 (0.08)    | 0.10                         | 0.76 (0.67 to 0.87) <sup>e)</sup> | 0.75 (0.66 to 0.86) <sup>e)</sup> |
| Yes                                        |               |                              |                                   |                                   |
| Unvaccinated                               | 300 (0.12)    | 0.07                         | 1.0 (reference)                   | 1.0 (reference)                   |
| Vaccinated                                 | 190 (0.08)    | 0.05                         | 0.62 (0.52 to 0.75) <sup>e)</sup> | 0.62 (0.51 to 0.74) <sup>e)</sup> |

Supplementary Table 6. Continued

| Hepatic failure                   | Events, n (%) | Incidence rate <sup>b)</sup> | aHR (95% CI)                      |                                   |
|-----------------------------------|---------------|------------------------------|-----------------------------------|-----------------------------------|
|                                   |               |                              | Model 1 <sup>c)</sup>             | Model 2 <sup>d)</sup>             |
| Medication use for diabetes       |               |                              |                                   |                                   |
| No                                |               |                              |                                   |                                   |
| Unvaccinated                      | 708 (0.11)    | 0.17                         | 1.0 (reference)                   | 1.0 (reference)                   |
| Vaccinated                        | 471 (0.07)    | 0.13                         | 0.70 (0.62 to 0.79) <sup>e)</sup> | 0.70 (0.62 to 0.78) <sup>e)</sup> |
| Yes                               |               |                              |                                   |                                   |
| Unvaccinated                      | 116 (0.12)    | 0.03                         | 1.0 (reference)                   | 1.0 (reference)                   |
| Vaccinated                        | 92 (0.09)     | 0.02                         | 0.76 (0.58 to 1.00)               | 0.76 (0.57 to 0.99) <sup>e)</sup> |
| Medication use for hyperlipidemia |               |                              |                                   |                                   |
| No                                |               |                              |                                   |                                   |
| Unvaccinated                      | 710 (0.11)    | 0.17                         | 1.0 (reference)                   | 1.0 (reference)                   |
| Vaccinated                        | 481 (0.08)    | 0.13                         | 0.72 (0.64 to 0.81) <sup>e)</sup> | 0.71 (0.63 to 0.80) <sup>e)</sup> |
| Yes                               |               |                              |                                   |                                   |
| Unvaccinated                      | 114 (0.11)    | 0.03                         | 1.0 (reference)                   | 1.0 (reference)                   |
| Vaccinated                        | 82 (0.07)     | 0.02                         | 0.68 (0.51 to 0.90) <sup>e)</sup> | 0.67 (0.50 to 0.89) <sup>e)</sup> |

aHR, adjusted hazard ratio; CI, confidence interval.

<sup>a)</sup>Non-smoker indicates individuals who do not currently smoke.

<sup>b)</sup>Incidence rate expressed as per 1,000 person-years.

<sup>c)</sup>Models 1: adjusted for age (50–54, 55–59, 60–64, and ≥ 65 years) and sex.

<sup>d)</sup>Model 2: adjusted for age (50–54, 55–59, 60–64, and ≥ 65 years); sex; household income (low income, middle income, and high income); region of residence (urban and rural); Charlson comorbidity index (0, 1, and ≥ 2); obesity (underweight [ $< 18.5 \text{ kg/m}^2$ ], normal [ $18.5\text{--}22.9 \text{ kg/m}^2$ ], overweight [ $23.0\text{--}24.9 \text{ kg/m}^2$ ], and obese [ $\geq 25.0 \text{ kg/m}^2$ ]); blood pressure (systolic blood pressure  $< 140 \text{ mmHg}$  and diastolic blood pressure  $< 90 \text{ mmHg}$  and systolic blood pressure  $\geq 140 \text{ mmHg}$  or diastolic blood pressure  $\geq 90 \text{ mmHg}$ ); fasting blood glucose ( $< 100$  and  $\geq 100 \text{ mg/dL}$ ); glomerular filtration rate ( $< 60$ ,  $60\text{--}89$ , and  $\geq 90 \text{ mL/min/1.73 m}^2$ ); smoking status (non-, ex-, and current smoker); alcohol consumption (drinks;  $< 1$ ,  $1\text{--}2$ ,  $3\text{--}4$ , and  $\geq 5$  days per week); aerobic physical activity (sufficient and insufficient); and history of medication use for coronary artery disease, diabetes mellitus, dyslipidemia, and hypertension.

<sup>e)</sup>Significant differences ( $p < 0.05$ ).
